# Supplementary material for: Glutathione-responsive deformable manganese-based nanomedicines for enhanced tumor-specific chemotherapy
Source: Royal Society of Chemistry journal article supplement (doi:10.1039/d6ra00177g), 2026-01-01
Supplement: d6ra00177g1.pdf [file d6ra00177g1.pdf]

# Glutathione-responsive deformable manganese-based nanomedicines for enhanced tumor-specific chemotherapy

Pengcheng Li<sup>#a</sup>, Jun Tao<sup>#b,c\*</sup>, Xinzeyu Yi<sup>#a</sup>, Qinghui Qi<sup>b</sup>, Zhou Liang<sup>b</sup>, Ye Wu<sup>a</sup>,  
Wubulitalipu Xirena<sup>a</sup>, Chenxian Ye<sup>a</sup>, Yunqin Ke<sup>a</sup>, Lianhui Wang<sup>b\*</sup>, Wanrong Yi<sup>a\*</sup>

<sup>a</sup>Department of Orthopedic Trauma and Microsurgery, Zhongnan Hospital of Wuhan University, Wuhan 430071, P. R. China.

<sup>b</sup>State Key Laboratory of Flexible Electronics (LoFE), Jiangsu Key Laboratory of Smart Biomaterials and Theragnostic Technology, Institute of Advanced Materials (IAM), Nanjing University of Posts & Telecommunications, Nanjing 210023, China.

<sup>c</sup>State Key Laboratory of Quality Research in Chinese Medicine, Institute of Chinese, Medical Sciences, University of Macau, Taipa, Macau, SAR, 999078 China

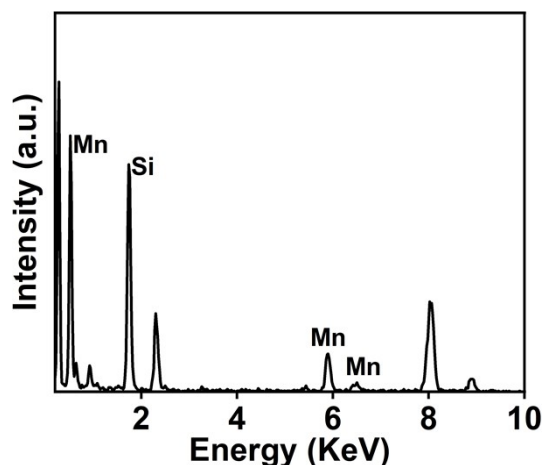

**Figure S1.** EDS of DMNs.

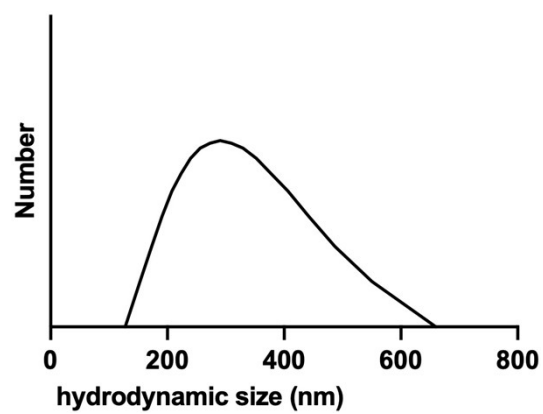

**Figure S2.** Hydrodynamic size of DMNs in PBS solution.

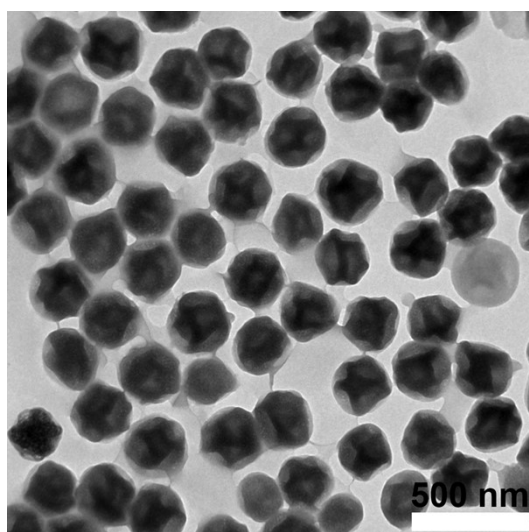

**Figure S3.** TEM image of DMNs in PBS solution.

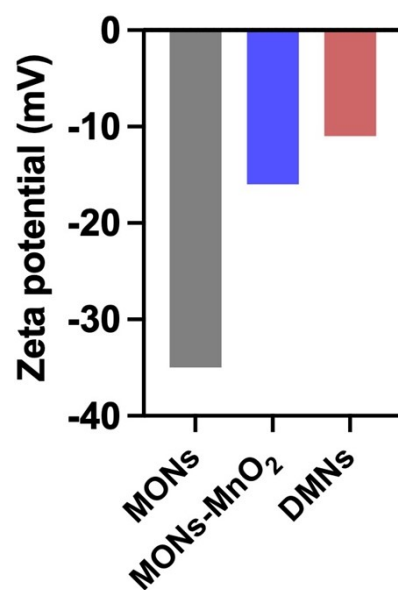

**Figure S4.** Zeta potential of MONs, MONs-MnO<sub>2</sub>, and DMNs.

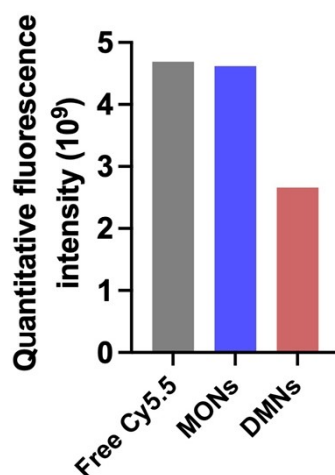

**Figure S5.** Quantitative mean fluorescence intensity of liver.

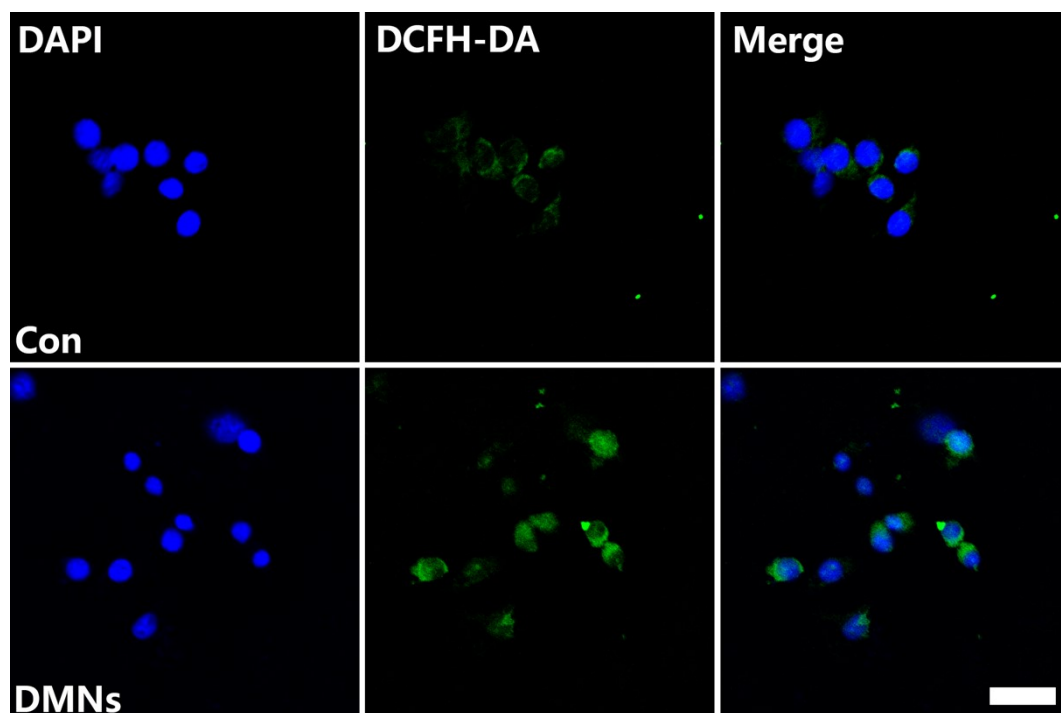

**Figure S6.** CLSM images of K7M2 cell.

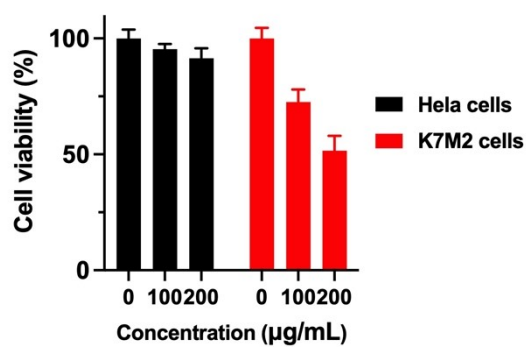

**Figure S7.** HeLa and K7M2 cell viability within vary concentrations of DMNs.

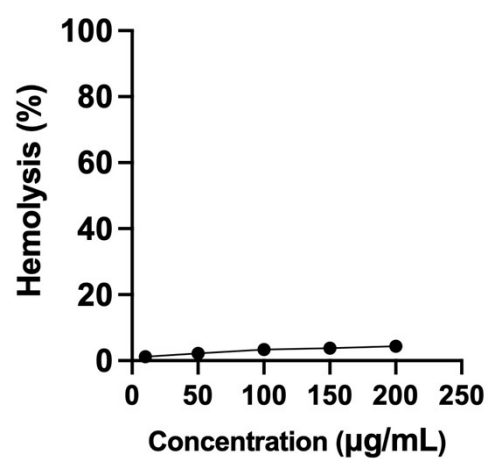

**Figure S8.** Hemolysis percentage of red blood cells upon incubation with vary concentration of DMNs.
